# Supplementary material for: HmbC, a Protein of the HMG Family, Participates in the Regulation of Carotenoid Biosynthesis in Fusarium fujikuroi
Source: MDPI journal article supplement (doi:10.3390/genes14081661), 2023-08-21
Supplement: s1 [file s1]

# HmbC, a protein of the HMG family, participates in the regulation of carotenoid biosynthesis in *Fusarium fujikuroi*

Marta Franco-Losilla, Steffen Nordziske, Ingo Feldmann, M. Carmen Limón, and Javier Avalos

## SUPPLEMENTARY MATERIAL

**Table S1.** Primers used for the generation of the constructs, probe and verification of DNA integration in the transformants.

| Set | Primer                   | Sequence [5' to 3']                                       | Use                                                           |
|-----|--------------------------|-----------------------------------------------------------|---------------------------------------------------------------|
| PS1 | HMGc_5_1F                | GTAACGCCAGGGTTTCCAGTCACGACG<br>ACCAGTCAGCGCTGCCCCGCG      | PCR <i>hmbC</i><br>deletion cassette                          |
|     | HMGc_3_2R                | GCGGATAACAAGTTCACACAGGAAACAG<br>CCCACATCAAAAGCAAAGGCC     |                                                               |
| PS2 | HMGc_3_2F                | CTCCTTCAATATCATCTTCTGTCTCCGACG<br>CTTCTTTACTCTCCGTTG      | PCR 3' fragment<br>of <i>hmbC</i>                             |
|     | HMGc_3_2R                | GCGGATAACAAGTTCACACAGGAAACAG<br>CCCACATCAAAAGCAAAGGCC     |                                                               |
| PS3 | HMGc_5_1F                | GTAACGCCAGGGTTTCCAGTCACGACG<br>ACCAGTCAGCGCTGCCCCGCG      | PCR 5' fragment<br>of <i>hmbC</i>                             |
|     | HMGc_5_1R                | ATCCACTTAACGTTACTGAAATCTCCAAC<br>CGCTGACGACTTGATGGGACGCGT |                                                               |
| PS4 | HPH-6F                   | GTCGGAGACAGAAGATGATATTGAAG<br>GAGC                        | PCR Hyg <sup>R</sup><br>cassette                              |
|     | HPH-6R                   | GTTGGAGATTTTCAGTAACGTTAAGTGGAT                            |                                                               |
| PS5 | HMGc_5_1F                | GTAACGCCAGGGTTTCCAGTCACGACG<br>ACCAGTCAGCGCTGCCCCGCG      | PCR 5' region of<br><i>hmbC</i> -Hyg <sup>R</sup><br>cassette |
|     | HPH-6R                   | GTTGGAGATTTTCAGTAACGTTAAGTGGAT                            |                                                               |
| PS6 | hmgBC_5_2F<br>Hph-11R    | GCAGCCAACACCTGTAGCAT<br>TGAGCTGATGCTTTGGGCCGA             | PCR test $\Delta hmbC$                                        |
| PS7 | HMGc_5_1F                | GTAACGCCAGGGTTTCCAGTCACGACG<br>ACCAGTCAGCGCTGCCCCGCG      | PCR test $\Delta hmbC$                                        |
|     | HMGc_5_1R                | ATCCACTTAACGTTACTGAAATCTCCAAC<br>CGCTGACGACTTGATGGGACGCGT |                                                               |
| PS8 | hmgBC_3_2F<br>hmgBC_3_2R | GCATGATACCTAAGGAGAGT<br>GAACTCCGTGAGCAATACAG              | Southern probe                                                |

**Table S2.** Primers used for quantitative RT-PCR

| Gene                          | Primers     | Sequence [5' to 3']    |
|-------------------------------|-------------|------------------------|
| <i>carS</i>                   | RtFfcarS-1F | GATACCCGGCGGAAAGGTTA   |
|                               | RtFfcarS-1R | CTGACAGTCCATTTCAGCGC   |
| <i>carB</i>                   | RTcarB-1F   | TCGGTGTCGAGTACCGTCTCT  |
|                               | RTcarB-1R   | TGCCTTGCCGGTTGCTT      |
| <i>carRA</i>                  | RTcarRA-1F  | CAGAAGCTGTTCCCGAAGACA  |
|                               | RTcarRA 1R  | TGCGATGCCCATTCTTGA     |
| <i><math>\beta</math>-tub</i> | Tub-2F      | CCGGTGCTGGAAACAACCTG   |
|                               | Tub-2R      | CGAGGACCTGGTCGACAAGT   |
| <i>gpdA</i>                   | RT-gpdh-1F  | GTGACCTCAAGGGCGTTCTG   |
|                               | RT-gpdh-1R  | CGAAGATGGAGGAGTTGGTGTT |

**Table S3.** Sequences of primers used for amplification of *car* promoters

| Name                 | Target promoter    | Sequence [5' to 3']                             | Use                                                |
|----------------------|--------------------|-------------------------------------------------|----------------------------------------------------|
| PcarB_fw_biotin      | <i>PcarB</i>       | <b>Biotin</b> -TGGGGTGAAGCGTG<br>GAGGATG        | Amplification of <i>carB</i> promoter              |
| PcarB_bw             | <i>PcarB</i>       | TTTGGCTGTAAAAAGTGAA<br>GATGCTCAGTG              |                                                    |
| PcarRAcarX_fw_biotin | <i>PcarRA/carX</i> | <b>Biotin</b> -CATGATGATATGTG<br>GACTATGATATTAC | Amplification of double <i>carRA/carX</i> promoter |
| PcarRAcarX_bw        | <i>PcarRA/carX</i> | CATTTTGACAAAGATTTAT<br>TTCGTG                   |                                                    |

**Table S4.** PCR setups and programs used to amplify biotin-labelled promoters

| <i>PcarB</i>                                 | <i>PcarRAcarX</i> | $\mu$ l | MM (x15) | Program             |                          |
|----------------------------------------------|-------------------|---------|----------|---------------------|--------------------------|
| 10x BioTaq                                   |                   | 10      | 150      | <b><i>PcarB</i></b> | <b><i>PcarRAcarX</i></b> |
| MgCl <sub>2</sub>                            |                   | 3       | 45       | 94°C-2'             | 94°C-2'                  |
| PcarB_fw_biotin                              | PcarB_bw          | 4       | 60       | 94°C-30''           | 94°C-30''                |
| PcarRAcarX_fw_biotin                         | PcarRAcarX_bw     | 4       | 60       | 55°C-30'' x35       | 52°C-30'' x34            |
| dNTPs                                        |                   | 2       | 30       | 72°C-28''           | 72°C-55''                |
| template: <i>F. fujikuroi</i> WT genomic DNA |                   | 2       | 30       | 72°C-10'            | 72°C-10'                 |
| BioTaq                                       |                   | 1       | 15       | 4°C-hold            | 4°C-hold                 |
| H <sub>2</sub> O                             |                   | 74      | 1,110    |                     |                          |
| Total                                        |                   | 100     | 1,500    |                     |                          |

**1 PCR of the different fragments**

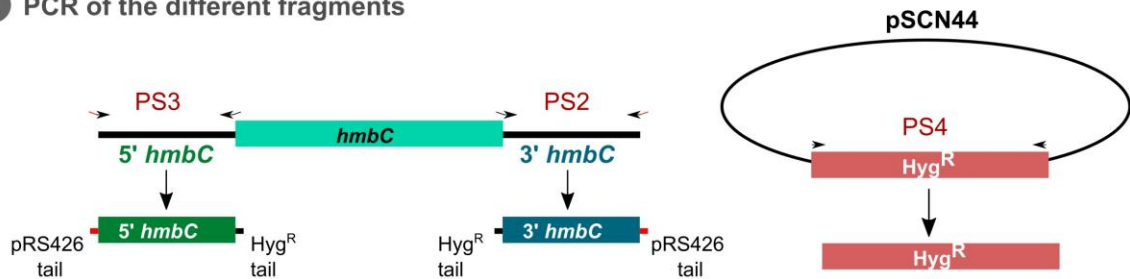

**2 Homologous recombination in *S. cerevisiae* FY834**

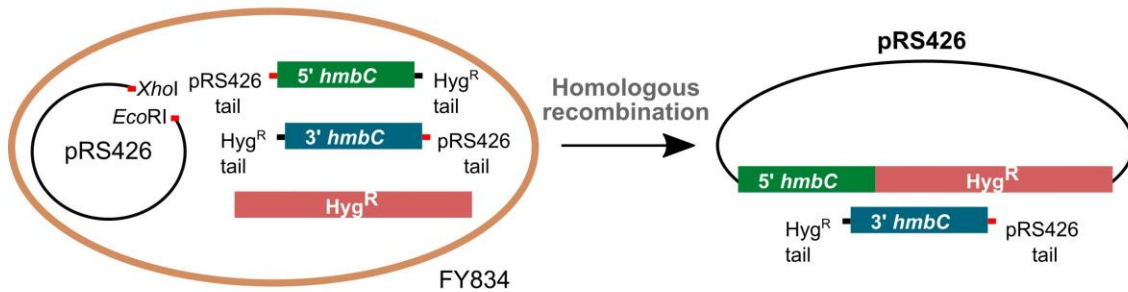

**3 Fusion PCR and ligation in pSPARK vector**

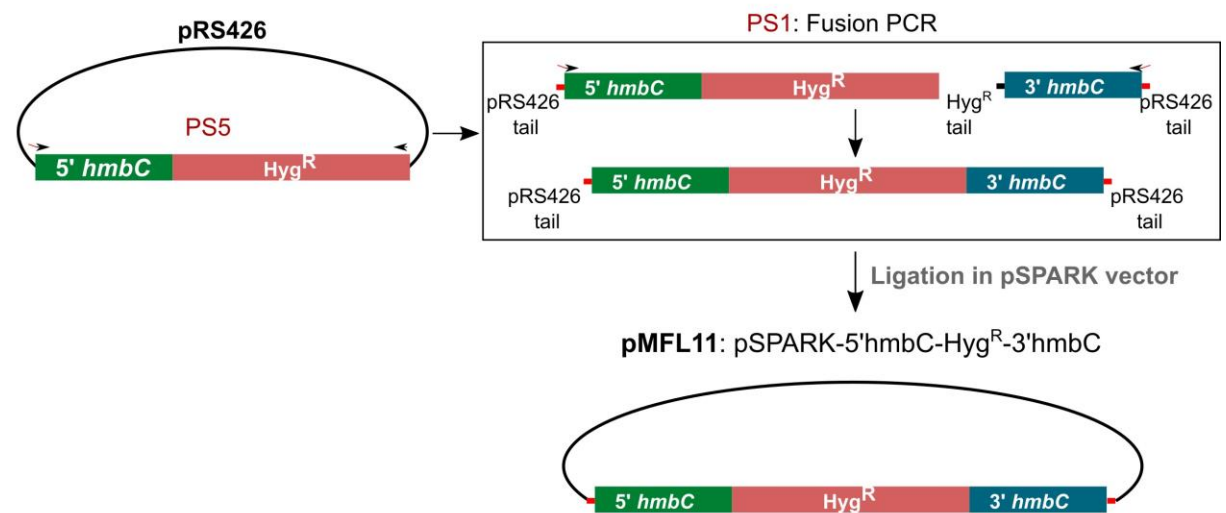

**Figure S1.** Construction of pMFL11 plasmid. Steps 1, 2 and 3 are described in the section of material and methods. Primer sets (PS#) are indicated in red. Primer locations are indicated by small arrows.

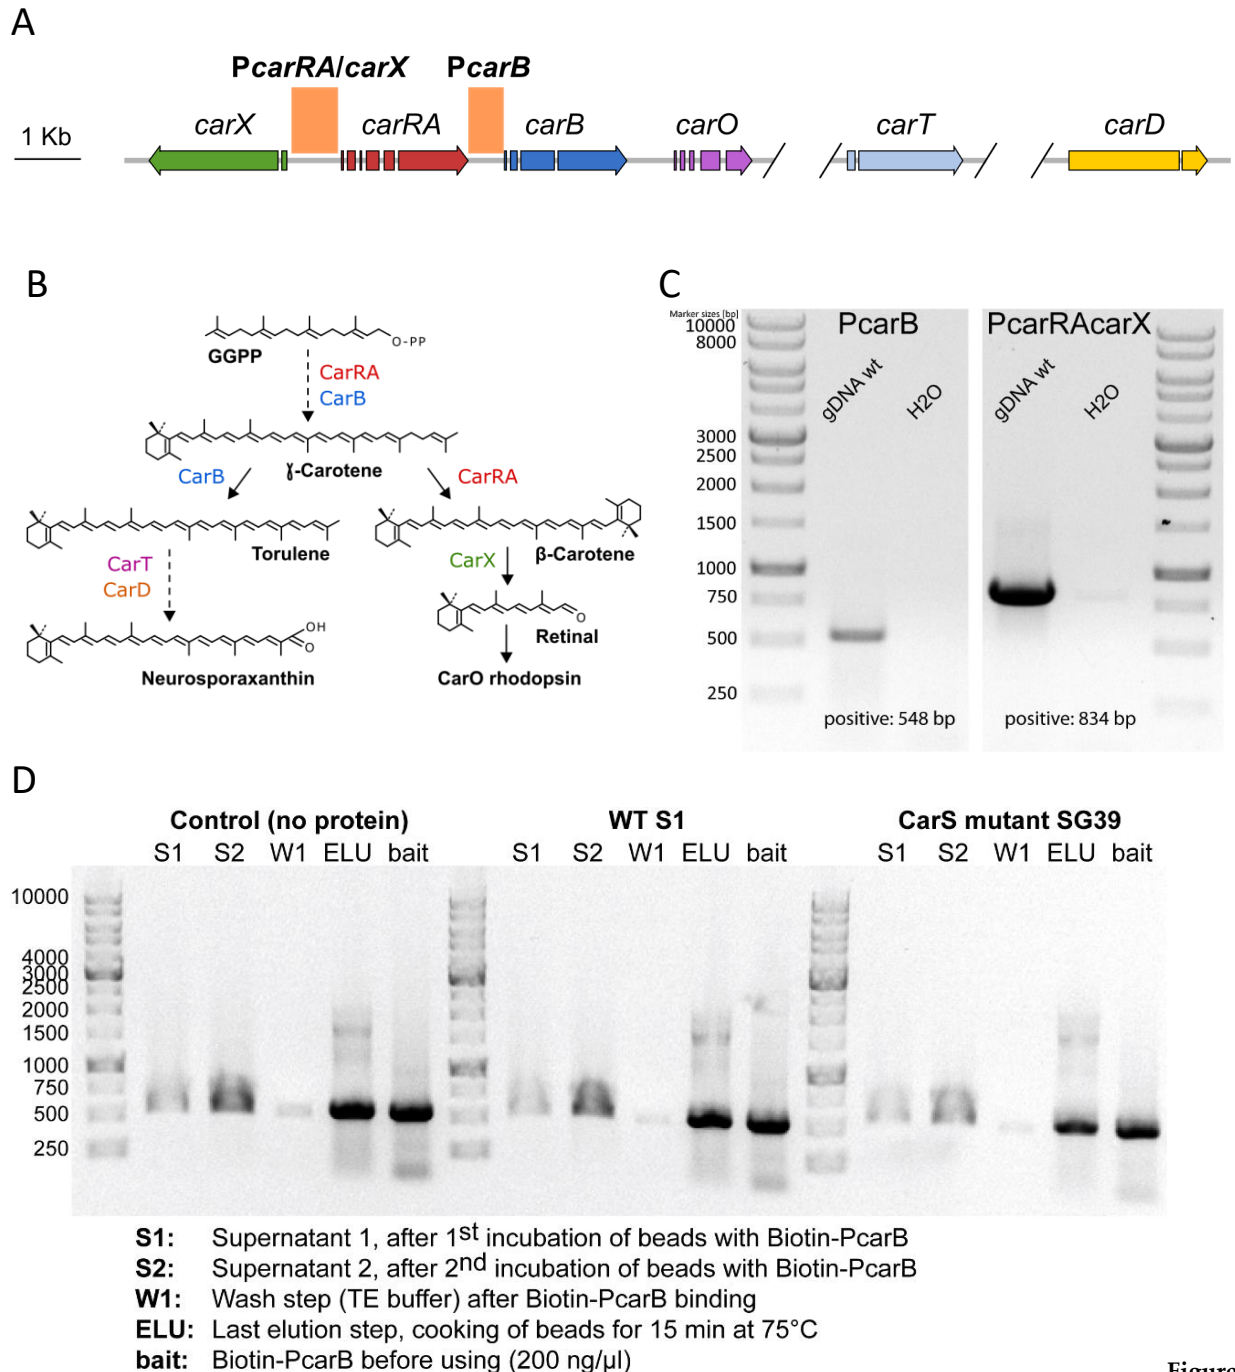

**Figure**

**S2.** (A) Genomic organization of the genes of the carotenoid pathway in *F. fujikuroi*. The *carRA*, *carB*, and *carX* genes are clustered with the *carO* rhodopsin gene. The regulatory segments *PcarRA/carX* and *PcarB* used in the pulldown assay are indicated. Genes *carT* and *carD* are at other genomic locations. Gaps in the genes indicate introns. (B) Simplified scheme of the *F. fujikuroi* carotenoid pathway. The steps in which each enzyme is involved is indicated. Dashed lines represent several enzymatic steps. (C) Amplification of biotin-coupled promoter regions of *PcarB* and *PcarRA/carX*. gDNA wt: amplification from genomic DNA of the wild type. (D) Control steps of the streptavidin pulldown confirming the binding of biotinylated *PcarB* (bait) to the streptavidin beads. Beads were incubated twice with biotinylated *PcarB* and supernatant was analyzed (S1 and S2). Additionally, a washing step with TE buffer (W1) and the final eluate (ELU) were visualized.

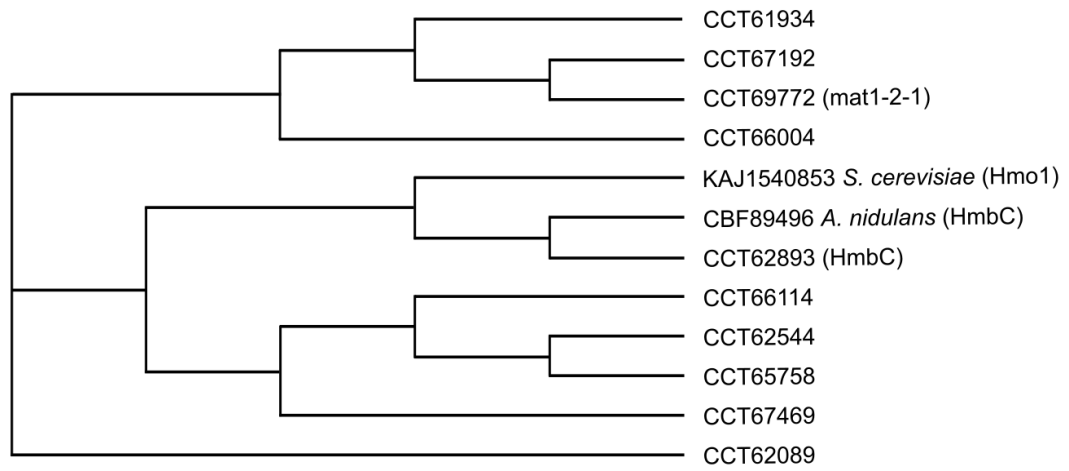

**Figure S3.** Cladogram representation of a neighbour-joining phylogenetic tree without distance corrections of the 10 proteins of the HMG-box family in *F. fujikuroi*. The sequences of the presumed HmbC orthologs in *S. cerevisiae* and *A. nidulans* are also included.



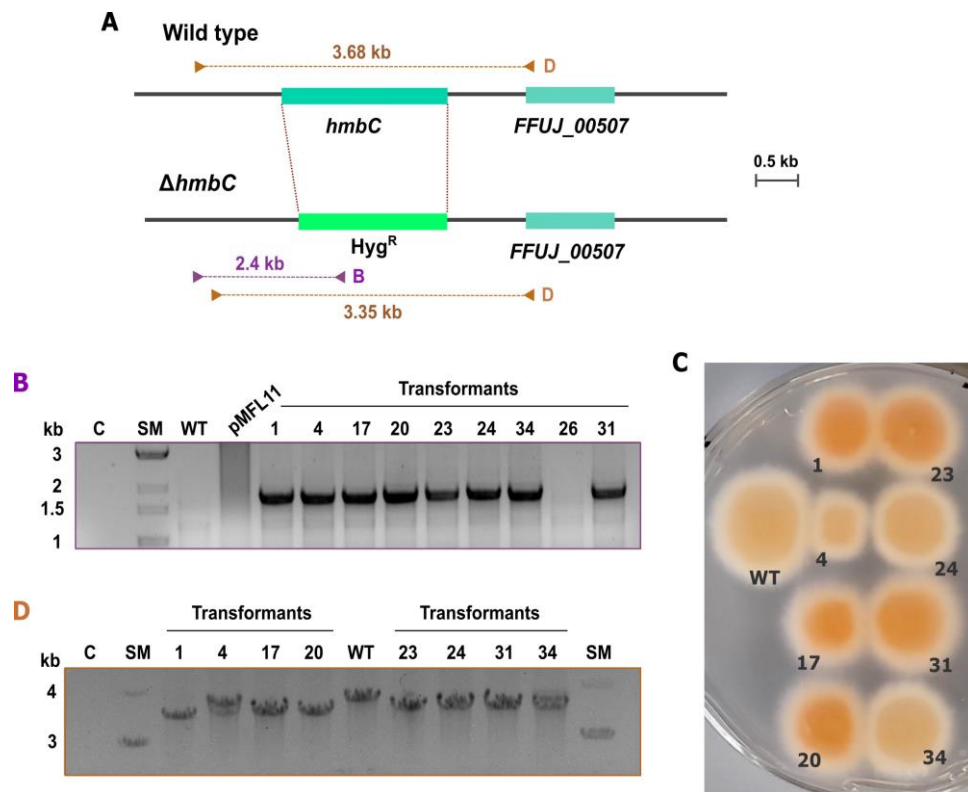

**Figure S5.** Screening of possible *hmbC* deletion transformants by PCR. **(A)** Map of the genomic *hmbC* region showing the expected homologous recombination generating the deletion. Expected amplicons of the PCR shown in panels B and D are indicated. **(B)** Electrophoresis of PCR carried out with genomic DNA of wild type and nine transformants using primer set PS6 to test the integration of the *Hyg<sup>R</sup>* cassette in the *hmbC* locus by homologous recombination. The positive 2.4 kb band was observed in eight of the transformants. As expected, no amplification was obtained from the wild type and from pMFL11 plasmid. **(C)** Aspect of the pigmentation of 4-day old colonies of the wild type (WT) and the positive transformants in panel B. Five of them (1, 17, 20, 23 and 31) exhibit a deeper pigmentation. **(D)** Electrophoresis of PCR amplifications with genomic DNA of wild type and the eight transformants using PS7 primer set that bind to the surrounding of the *hmbC* locus, that are absent in the deletion cassette. The replacement should result in a 0.3 kb reduction in the size of the PCR product. Except transformant 4, the other transformants exhibit the expected shift in the product size. C: control without DNA. SM: size markers.



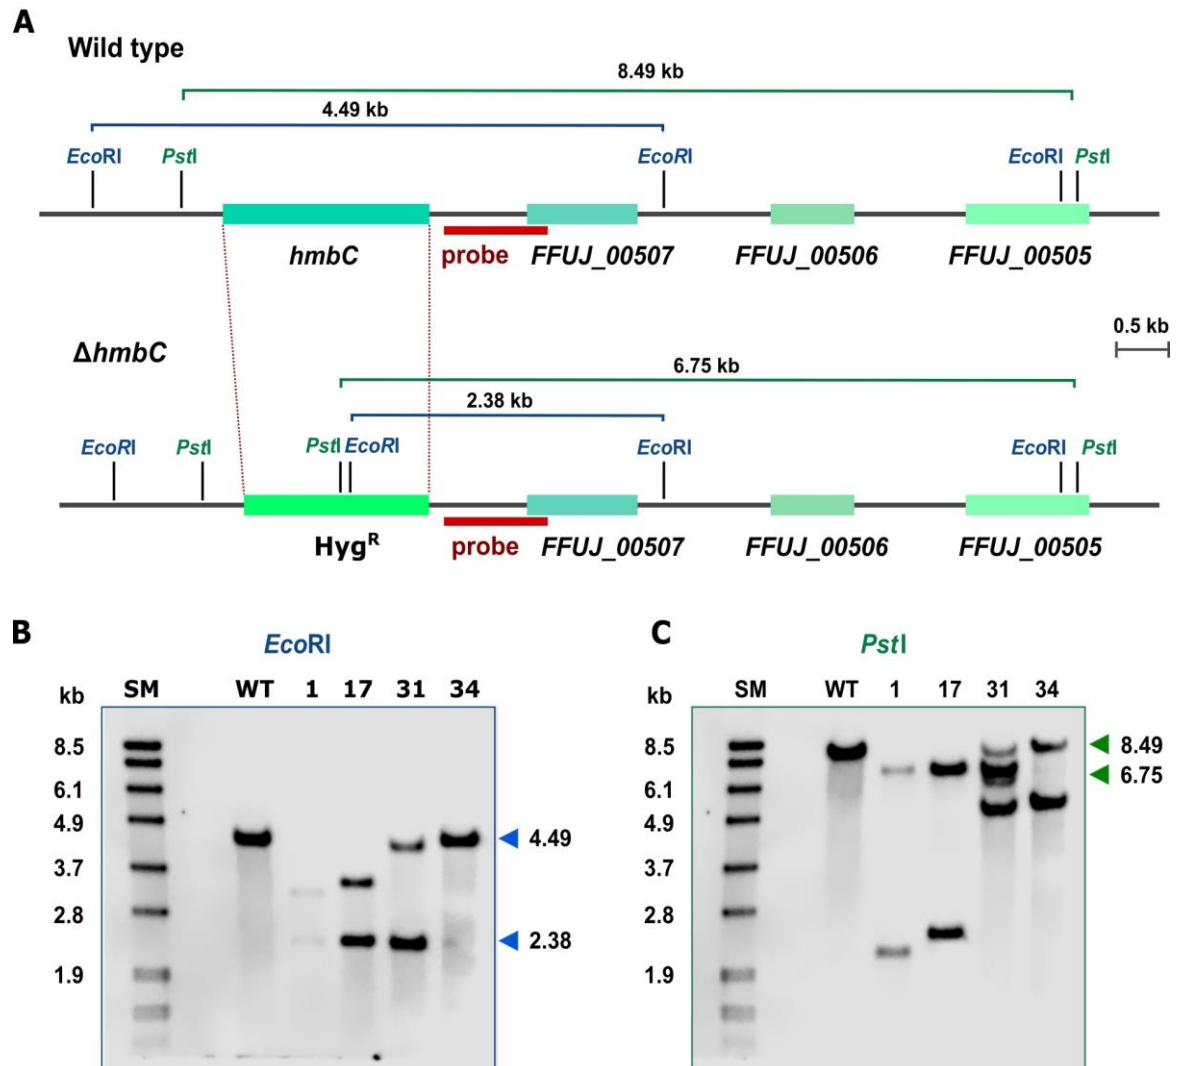

**Figure S6.** Identification by Southern blot of transformants with *hmbC* deletion. **(A)** Restriction map of the genomic *hmbC* region showing the expected homologous recombination generating the deletion. A probe obtained by PCR using PS8 primer set is shown as well as the expected hybridizing bands upon *EcoRI* or *PstI* digestions. **(B)** and **(C)**, Southern blot analysis of genomic DNA from the wild type and transformants 1, 17, 31, and 34 digested with *EcoRI* or *PstI*. SM: Size markers. Sizes of relevant bands are indicated on the right.

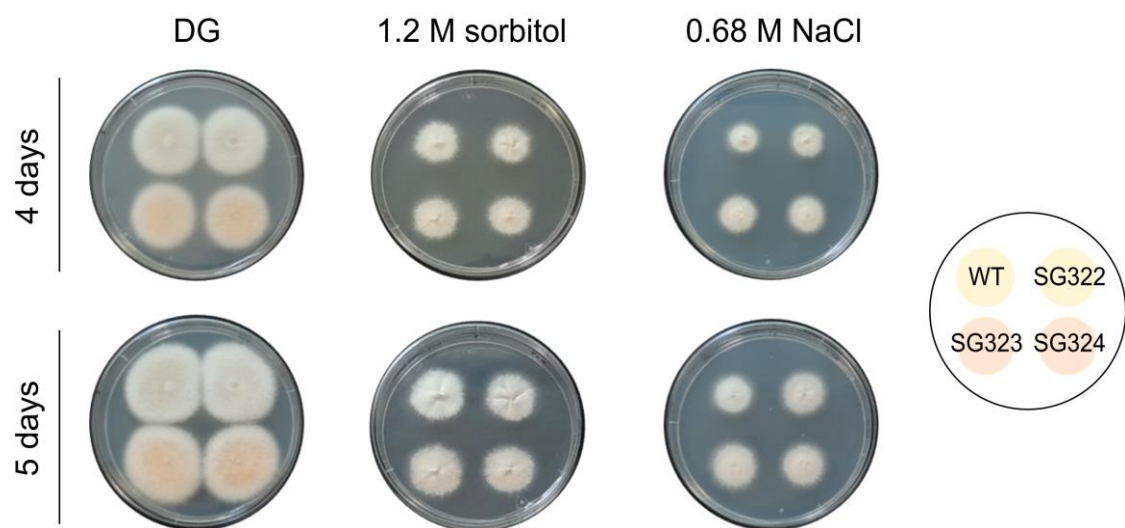

**Figure S7.** Effect of osmotic stress in the *hmbC* mutants and control strains. A small sample of mycelium from the wild type and *hmbC* deletions strain were inoculated on different osmotic stress media with tweezers from a fresh colony. These strains were grown for 4 and 5 days at 30 °C under dark conditions in DGasn minimal medium, without or with 1.2 M sorbitol or 0.68 M NaCl.

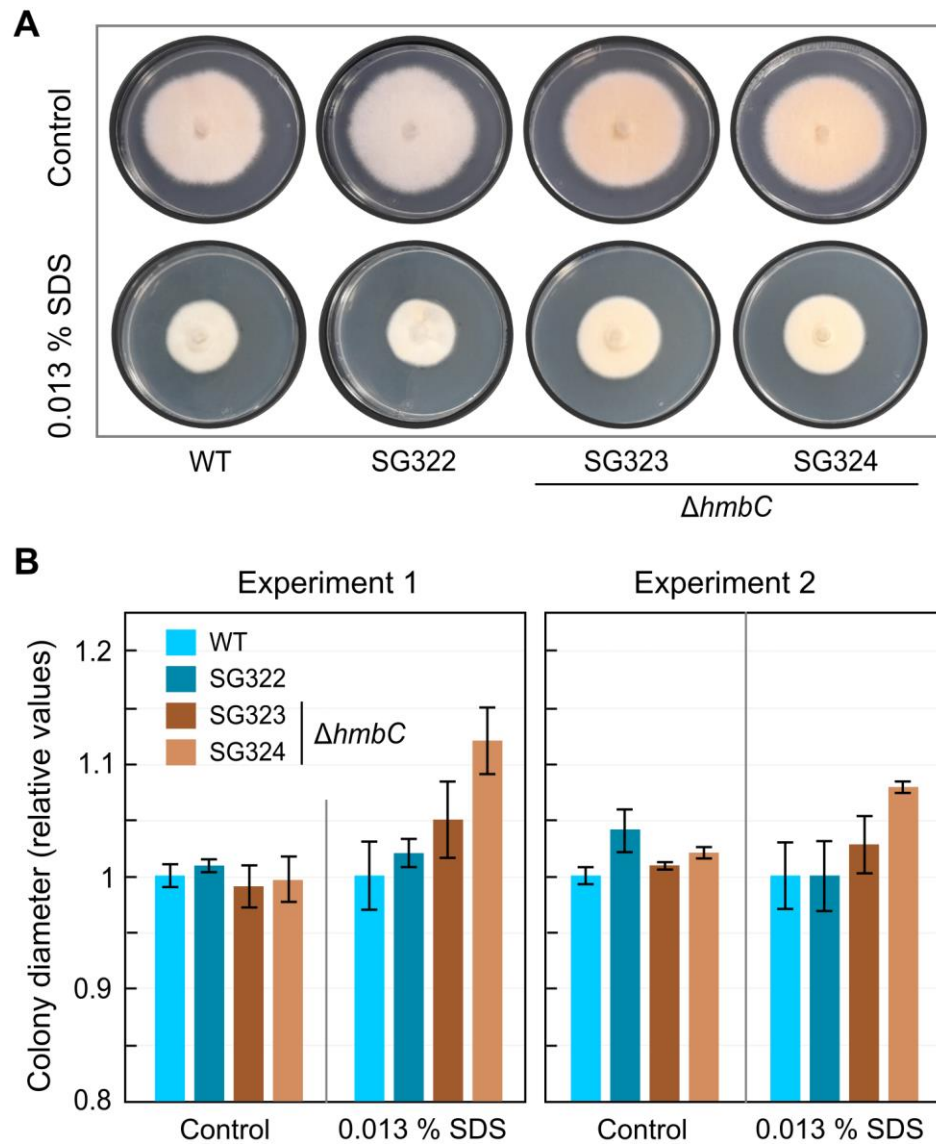

**Figure S8.** Effect of SDS on growth of  $\Delta hmbC$  mutants and control strains. **(A)** Agar cultures of the indicated strains for 7 days on DG minimal medium and 0.013% SDS stress medium at 30 °C under dark conditions. **(B)** Size of the colonies after 7 days on DG minimal medium and 0.013% SDS medium at 30 °C. Data show the average and standard error from two independent experiments with four parallel cultures in Petri dishes. The statistic Student's *t* test gave values of  $p > 0.05$ , indicating no significant differences among the strains in the presence of SDS.
